# Supplementary material for: Fixed-length haplotypes can improve genomic prediction accuracy in an admixed dairy cattle population
Source: PubMed Central journal article supplement (PMC5494768; doi:10.1186/s12711-017-0329-y), 2017-07-03
Supplement: 12711_2017_329_MOESM1_ESM.pdf [file 12711_2017_329_MOESM1_ESM.pdf]

— SNP    -- NoBias    Threshold:    ● 1%    ● 2.5%    ● 5%    ● 10%

Prediction Accuracy

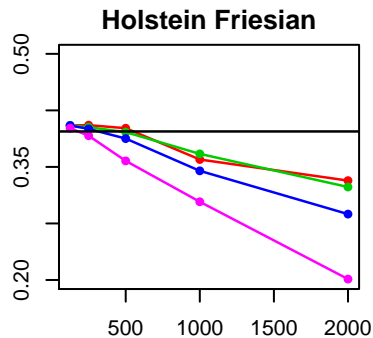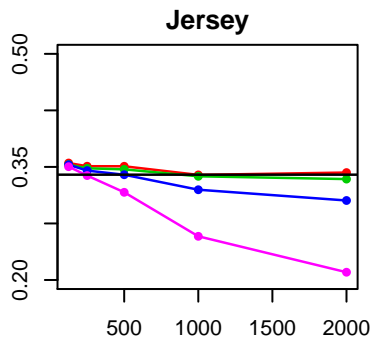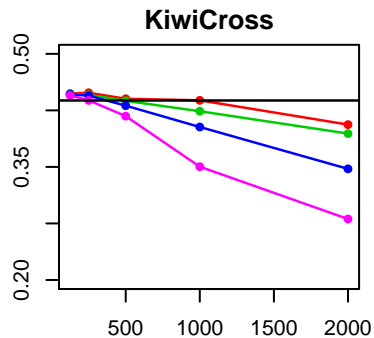

Prediction Bias

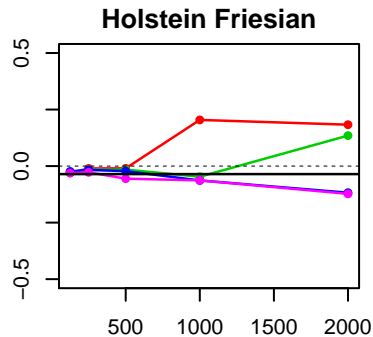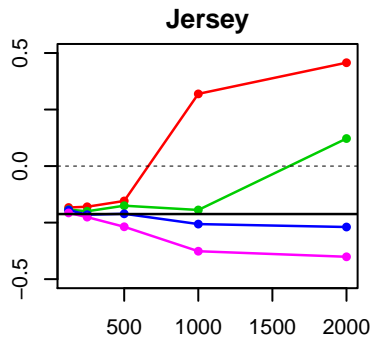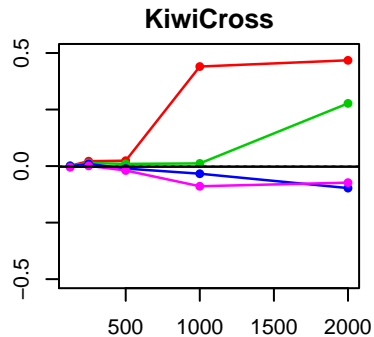

Haploblock Length (kb)
