# Supplementary material for: Fixed-length haplotypes can improve genomic prediction accuracy in an admixed dairy cattle population
Source: PubMed Central journal article supplement (PMC5494768; doi:10.1186/s12711-017-0329-y), 2017-07-03
Supplement: 12711_2017_329_MOESM6_ESM.pdf [file 12711_2017_329_MOESM6_ESM.pdf]

■ SNP

■ Hap125

■ Hap250

--- HF

--- J

--- KX

X Max

**Milk Fat Yield**

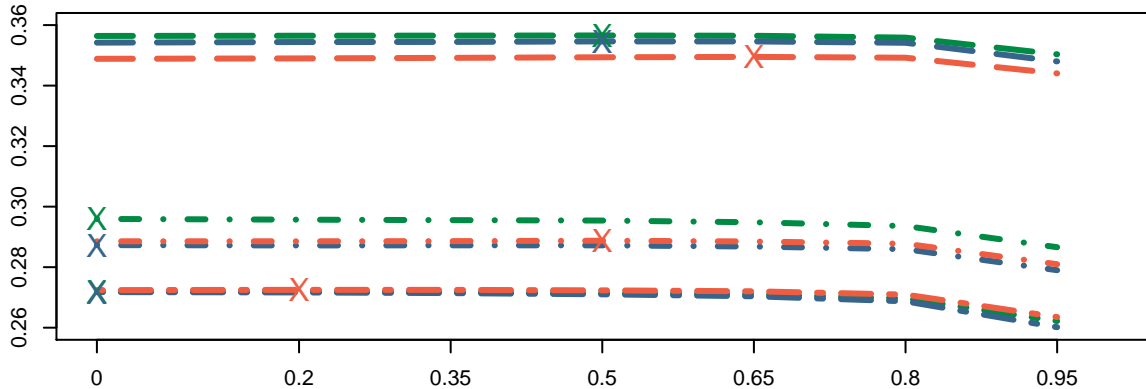

**Liveweight**

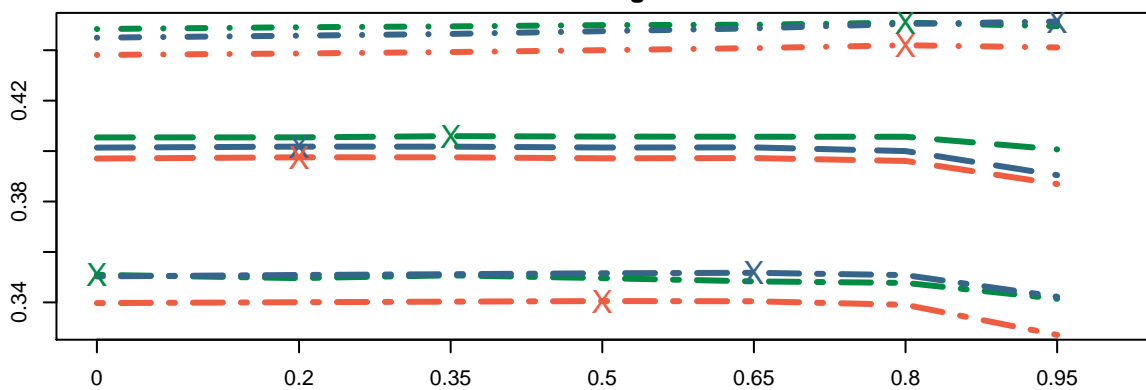

**Somatic Cell Score**

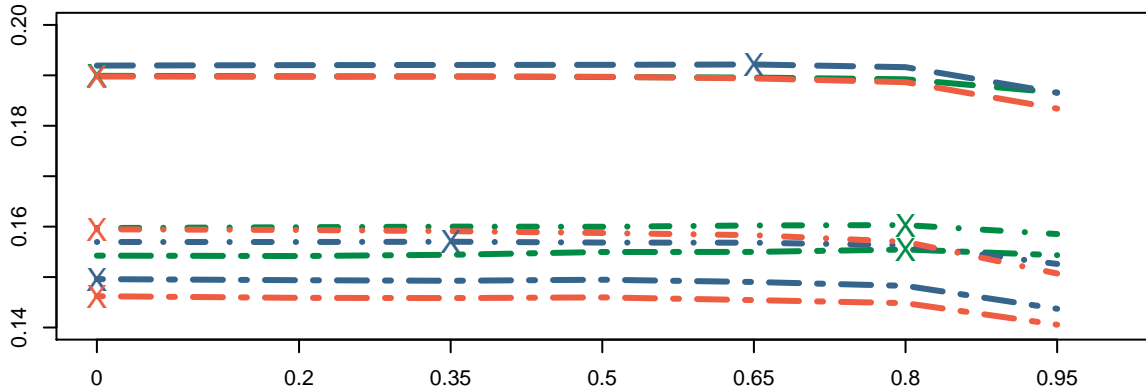

Prediction Accuracy

Pi
